# Supplementary material for: Accelerated FoxP2 Evolution in Echolocating Bats
Source: PLoS One. 2007 Sep 19;2(9):e900. doi: 10.1371/journal.pone.0000900 (PMC1976393; doi:10.1371/journal.pone.0000900)
Supplement: Table S4 — Exon 7 of FoxP2. For abbreviations, see Table S2. (0.13 MB DOC) [file pone.0000900.s004.doc]

|  |  | species | | 278 | 279 | 280 | 283 | 284 | 294 | 298 | 302 | 303 | 304 | 307 | 309 | 312 | 315 | 316 | 317 | 321 | 322 | 323 | 325 | 326 |
| --- | --- | --- | --- | --- | --- | --- | --- | --- | --- | --- | --- | --- | --- | --- | --- | --- | --- | --- | --- | --- | --- | --- | --- | --- |
| S | O | consensus | | S | M | E | G | I | N | S | S | T | T | A | P | T | S | I | V | S | S | V | N | A |
| E | Pr | human | | . | . | . | . | . | . | . | . | N | . | . | . | . | . | . | . | . | . | . | S | . |
| 5 apes, 3 monkeys, lemur and galago | | . | . | . | . | . | . | . | . | . | . | . | . | . | . | . | . | . | . | . | . | . |
| Eu | Eurasian shrew and Oriental water shrew | | . | . | . | A | . | . | . | . | . | . | . | . | . | . | . | . | . | . | . | . | . |
| African hedgehog | | . | . | . | . | . | . | . | . | . | . | . | . | . | . | . | . | . | . | . | . | S |
| R/L | mouse and rabbit | | . | . | . | . | . | . | . | . | . | . | . | . | . | . | . | . | . | . | . | . | . |
| Af | X | nine-banded armadillo | | . | . | . | . | . | . | . | . | . | . | . | . | . | . | . | . | . | . | . | . | . |
| M/Pr | elephant shrew and African elephant | | . | . | . | . | . | . | . | . | . | . | . | . | . | . | . | . | . | . | . | . | . |
| L | Ce | 18 cetaceans | | . | . | . | . | . | . | . | P | . | A | . | . | . | . | M | . | . | . | . | . | . |
| Ar | goat | | . | . | . | . | . | . | . | . | . | . | . | . | . | T | . | . | . | . | . | . | . |
| pig | | . | . | D | . | . | . | . | . | . | . | . | . | . | . | . | . | . | . | . | . | . |
| Pe | donkey | | . | . | . | . | . | . | . | . | . | . | . | . | . | . | . | . | . | . | . | . | . |
| Ca | hog badger and cat | | . | . | . | . | . | . | . | . | . | . | . | . | . | . | . | . | . | . | . | **S** | . |
| Ch | P (Yi) | *Eonycteris spelaea*2, *Pteropus rodricensis*2 and *Rousettus leschenaulti*1 | . | . | . | . | . | . | . | . | . | . | **V** | . | . | . | . | . | . | . | **L** | . | . |
| P (Yi) | Cynopterus sphinx2 | . | . | . | . | . | . | . | . | . | **I** | **V** | . | . | . | . | **M** | . | . | **H** | . | . |
| R (Yi) | *Rhinolophus ferrumequinum*3, *R. luctus*3, *R. marshalli* 3and *R.paradoxolophus*3 | . | . | . | . | . | . | . | . | . | . | . | . | **P** | . | . | . | . | **A** | . | **S** | . |
| R (Yi) | Rhinolophus pusillus3 | . | . | . | . | . | . | . | . | . | . | . | . | **P** | . | . | . | **A** | **A** | . | **S** | . |
| H (Yi) | *Aselliscus stoliczkanus*3, *A. tricuspidatus*3*,* *Hipposideros amiger*3, *H. larvatus*3 and *H. pomona*3 | . | . | . | . | . | . | . | . | . | . | . | . | **P** | . | M | . | . | . | . | **S** | . |
| H (Yi) | Coelops frithi3 | . | . | . | . | . | **S** | . | . | . | . | . | . | **P** | . | M | . | . | . | . | **S** | . |
| Me (Yi) | *Megaderma spasma*4 and *M. lyra*4 | **N** | . | . | . | . | **T** | . | . | **S** | . | . | . | . | . | . | . | . | . | . | **S** | . |
| E (Ya) | Taphozous melanopogon5 | . | **L** | . | . | . | . | . | . | . | . | . | . | . | . | . | . | . | . | . | . | . |
| Ph (Ya) | Carollia perspicillata4 | . | . | . | . | **M** | . | **L** | . | . | . | . | . | . | . | . | . | **T** | . | . | **S** | . |
| Mo (Ya) | *Pteronotus macleayii*5, *P. parnellii*3 and *P*. *quadridens*5 | . | . | . | . | **M** | . | . | . | . | . | . | . | . | . | . | . | . | . | . | **T** | . |
| V (Ya) | Tylonycteris pachypus6 | . | . | . | . | **M** | . | **L** | P | . | . | . | . | . | . | . | . | . | . | . | . | **T** |
| V (Ya) | *Barbastella leucomelas*7, *Ia io*6, *Murina sp*7, *Myotis ricketti*7, *Pipistrellus abramus*6, *Plecotus sp*.4, *Scotomanes ornatus*6 and *Scotophilus kuhlii*6 | . | . | . | . | . | . | **L** | P | . | . | . | . | . | . | . | . | . | . | . | . | **T** |
| M (Ya) | Chaerephon plicata6 | . | . | . | . | . | . | **L** | . | . | . | **V** | . | . | . | . | . | . | . | . | . | . |
| V (Ya) | Miniopterus schreibersi6 | **N** | . | . | . | . | . | **L** | . | . | . | . | **S** | . | . | . | . | . | . | . | . | . |
