# Supplementary material for: Accelerated FoxP2 Evolution in Echolocating Bats
Source: PLoS One. 2007 Sep 19;2(9):e900. doi: 10.1371/journal.pone.0000900 (PMC1976393; doi:10.1371/journal.pone.0000900)
Supplement: Table S5 — Exon 17 of FoxP2. For abbreviations, see Table S2. (0.10 MB DOC) [file pone.0000900.s005.doc]

|  |  | species | | 671 | 678 | 679 | 680 | 687 | 691 | 692 | 694 | 698 | 699 | 701 | 705 | 707 | 710 | 713 |
| --- | --- | --- | --- | --- | --- | --- | --- | --- | --- | --- | --- | --- | --- | --- | --- | --- | --- | --- |
| S | O | consensus | | I | V | I | A | M | T | T | N | E | L | D | I | E | L | D |
| E | Pr | human | | . | . | . | . | . | . | . | . | . | . | . | . | . | . | . |
| 5 apes, 3 monkeys, lemur and galago | | . | . | . | . | . | . | . | . | . | . | . | . | . | . | . |
| Eu | Eurasian shrew, Oriental water shrew and African hedgehog | | . | . | . | . | . | . | . | . | . | . | . | . | . | . | . |
| R/L | mouse, rabbit, and flying squirrel | | . | . | . | . | . | . | . | . | . | . | . | . | . | . | . |
| Af | X | nine-banded armadillo | | . | . | . | . | . | . | . | . | . | . | . | . | . | . | . |
| M/Pr | elephant shrew and African elephant | | . | . | . | . | . | . | . | . | . | . | . | . | . | . | . |
| L | Ce | 15 cetaceans | | . | . | . |  | . | . | . | . | . | . | . | . | . | . | . |
| Ar/Pe | goat donkey and horse | | . | . | . | . | . | . | . | . | . | . | . | . | . | . | . |
| pig | | . | . | M | . | . | . | . | . | . | . | . | . | . | . | . |
| Ca | hog badger and cat | | . | . | . | . | . | . | . | . | . | . | . | . | . | . | . |
| Ch | P (Yi) | *Cynopterus sphinx2*, *Eonycteris spelaea2*, *Nyctimene cephalotes2*, *Pteropus rodricensis2* and *Rousettus leschenaulti1* | . | . | . | . | . | . | . | . | . | . | . | . | . | . | . |
| R (Yi) | *Rhinolophus affinis3*, *R. ferrumequinum3*, *R. luctus3*, *R*. *macrotis3*, *R. marshalli3*, *R. osgoodi3*, *R. pearsonii3*, *R. pusillus3* and *R. paradoxolophus3* | . | . | . | . | . | **A** | . | . | . | . | . | . | . | . | **E** |
| R (Yi) | *Aselliscus stoliczkanus3*and *A. tricuspidatus3* | . | . | . | . | **I** | . | . | . | . | . | . | . | **D** | . | **E** |
| H (Yi) | Hipposideros amiger3, H. larvatus3, H. pomona3 and H. pratti3 | . | . | . | . | **I** | . | . | . | . | . | . | . | . | . | **E** |
| H (Yi) | Coelops frithi3 | **V** | . | . | . | **I** | . | . | **D** | . | . | . | **M** | **D** | . | **E** |
| Me (Yi) | Megaderma spasma4 |  |  |  |  |  |  |  |  |  |  |  |  |  |  |  |
| E (Ya) | Taphozous melanopogon5 | . | . | . | . | . | . | . | . | . | . | . | . | . | . | . |
| N (Ya) | Nycteris tragata4 | . | **A** | . | **T** | . | . | **A** | . | **A** | **F** | **E** | **V** | . | **S** | . |
| Ph (Ya) | Carollia perspicillata4 | . | . | . | . | . | . | . | . | . | . | . | . | . | . | . |
| Mo (Ya) | *Mormoops blainvillii*5, *Pteronotus macleayii*5, and *P*. *quadridens*5 | . | . | . | . | . | . | . | . | . | . | . | . | . | . | . |
| Mo (Ya) | P. parnellii3 | . | . | . | . | **I** | . | . | . | . | . | . | . | . | . | . |
| V (Ya) | *Barbastella leucomelas*7, *Ia io*6, *Miniopterus schreibersi*6, *Nyctalus velutinus*6, *Plecotus sp*.4, *Scotomanes ornatus*6, *Scotophilus kuhlii*6*,* *Tylonycteris pachypus*6and *Vespertilio sinensis*6 | . | . | . | . | **V** | . | . | . | . | . | . | . | . | . | . |
| V (Ya) | Murina sp.7 and Myotis ricketti7 | . | . | M | . | **V** | . | . | . | . | . | . | . | . | . | . |
| M (Ya) | Chaerephon plicata6 | . | . | . | . | **V** | . | . | . | . | . | . | . | . | . | . |
